Anesthesiology  
1996; 85:1092-9  
© 1996 American Society of Anesthesiologists, Inc.  
Lippincott-Raven Publishers

## Differential Effects of Etomidate, Propofol, and Midazolam on Calcium and Potassium Channel Currents in Canine Myocardial Cells

Nediljka Buljubasic, M.D.,\* Jure Marijic, M.D.,† Viktor Berczi, M.D., Ph.D.,‡ Darko F. Supan, Ph.D.,§  
John P. Kampine, M.D., Ph.D.,|| Zeljko J. Bosnjak, Ph.D.#

**Background:** Intravenous anesthetics etomidate, propofol, and midazolam produce negative inotropic effects of various degrees. The mechanism underlying these differences is largely unknown.

**Methods:** The effects of intravenous anesthetics on L-type  $Ca^{2+}$ , transient outward and inward-rectifier  $K^+$  channel currents ( $I_{Ca}$ ,  $I_{Kto}$ , and  $I_{K1}$ ) were compared in canine ventricular cells using the whole-cell voltage-clamp technique.  $I_{Ca}$  and  $I_K$  were elicited by progressively depolarizing cells from  $-40$  to  $+40$  mV, and from  $-90$  to  $+60$  mV, respectively. The peak amplitude and time-dependent inactivation rate of  $I_{Ca}$  and  $I_K$  were measured before, during, and after the administration of equimolar concentrations (5, 30, or 60  $\mu M$ ) of etomidate, propofol, or midazolam.

**Results:** Exposure to etomidate, propofol, and midazolam produced a concentration-dependent inhibition of  $I_{Ca}$ . Midazolam was the most potent intravenous anesthetic; at 60  $\mu M$ , etomidate, propofol, and midazolam decreased peak  $I_{Ca}$  by  $16 \pm 4\%$  (mean  $\pm$  SEM),  $33 \pm 5\%$ , and  $47 \pm 5\%$ , respectively. Etomidate, propofol, and midazolam given in a 60- $\mu M$  concentration decreased  $I_{Kto}$  by  $8 \pm 3\%$ ,  $9 \pm 2\%$ , and  $23 \pm 3\%$ , respectively.  $I_{K1}$  was decreased by 60  $\mu M$  etomidate and midazolam

by  $20 \pm 6\%$  and  $14\% \pm 5\%$ , respectively. Propofol had no effect on  $I_{K1}$ .

**Conclusions:** At equimolar concentrations, intravenous anesthetics decreased the peak  $I_{Ca}$ ,  $I_{Kto}$ , and  $I_{K1}$  with various degrees of potency. Effects of anesthetics on  $I_{Ca}$  were significantly greater compared with their effects on  $K^+$  currents. These findings suggest that the negative inotropic actions of etomidate, propofol, and midazolam are related, at least in part, to decreased  $I_{Ca}$ . Some effects, such as  $I_K$  inhibition, may partially antagonize effects of decreased  $I_{Ca}$ . Indeed, the final effect of these intravenous anesthetics on myocardium will be the sum of these and other sarcolemmal and intracellular effects. (Key words: Anesthetics, intravenous: etomidate; midazolam; propofol. Animal: dog. Current: calcium; potassium. Tissue: myocardium; ventricular.)

INTRAVENOUS anesthetics etomidate, propofol, and midazolam are used to induce and maintain general anesthesia and to provide sedation during local and regional anesthesia. These agents can depress cardiovascular function in humans<sup>1-3</sup> and animals.<sup>4,5</sup>

The mechanisms underlying *in vivo* cardiovascular depression by intravenous anesthetics are not well understood but probably include a reduction in afterload<sup>6,7</sup> and preload<sup>8,9</sup> and direct myocardial depression.<sup>10,11</sup> Although the mechanisms of intravenous anesthetic-induced negative inotropic effects appear to be diverse,<sup>6,11-14</sup> increasing evidence suggests that these agents exert direct negative inotropic actions *in vivo*<sup>1-5</sup> and *in vitro*.<sup>13,15,16\*\*</sup> Because changes in contractile force reflect an interaction between  $Ca^{2+}$  influx and  $K^+$  efflux through the sarcolemma,  $Ca^{2+}$  release and sequestration by the sarcoplasmic reticulum, activity of membrane  $Ca^{2+}$  and  $K^+$  pumps, and the  $Ca^{2+}$  sensitivity of the contractile proteins, it is possible that these agents may interfere with any one of these steps, thus decreasing contractility. Although all intravenous anesthetics have negative inotropic effects, researchers frequently contend that etomidate

\*Resident, Department of Internal Medicine.

†Fellow, Department of Anesthesiology.

‡Postdoctoral Fellow, Department of Anesthesiology.

§Research Associate, Department of Anesthesiology.

||Professor and Chair, Department of Anesthesiology; Professor of Physiology.

#Professor, Departments of Anesthesiology and Physiology.

Received from the Department of Anesthesiology, The Medical College of Wisconsin, Milwaukee, Wisconsin. Submitted for publication January 4, 1993. Accepted for publication June 19, 1996. Supported by National Institutes of Health grant 34708 and Anesthesiology Research Training grant GM08377.

Address reprint requests to Dr. Bosnjak: Medical College of Wisconsin, MEB, Room 462c, 8701 Watertown Plank Road, Milwaukee, Wisconsin 53226. Address electronic mail to zbosnjak@post.its.mcw.edu.

\*\*Rusy BF, Thomas-King PY, King GP, Komai H: Effects of propofol on the contractile state of isolated rabbit papillary muscles under various stimulation conditions (Abstract). ANESTHESIOLOGY 1990; 73:A560.

## IV ANESTHETICS ON MEMBRANE CURRENTS

is the least potent.<sup>4,11</sup>†† Preliminary studies implicate sarcolemmal ion channels as a potential site of intravenous anesthetic-induced negative inotropic action.<sup>13\*\*</sup>‡‡

Our goal was to gain greater insight into the mechanisms underlying the negative inotropic effects of intravenous anesthetics by evaluating and comparing the effects of etomidate, propofol, and midazolam on the high-threshold  $\text{Ca}^{2+}$  current ( $I_{\text{Ca}}$ ), low-threshold transient  $\text{K}^+$  current ( $I_{\text{K}_\text{to}}$ ), and the inward-rectifier  $\text{K}^+$  current ( $I_{\text{K}_1}$ ) in single canine ventricular cells using the whole-cell patch-clamp technique.

## Materials and Methods

### Preparation of Single Ventricular Cells

These experiments were approved by the Medical College of Wisconsin Animal Care Committee, and all experimental procedures strictly conformed to the standards of American Association for Accreditation of Laboratory Animal Care. Adult mongrel dogs weighing 15 to 25 kg were placed in a Plexiglas box and anesthetized with halothane. After surgical anesthesia was attained, the trachea was intubated and the lungs were ventilated with 1.5% halothane in oxygen. The chest was opened and the heart was excised rapidly and placed in cold Krebs' solution. Thin strips of the ventricular tissue were cut into 5-mm lengths and placed in cold cardioplegia solution composed of 10 mM NaCl, 60 mM KCl, 5 mM  $\text{MgCl}_2$ , 20 mM glucose, 100 mM sucrose, 5 mM pyruvate, 20 mM taurine, 5 mM N-2-hydroxyethylpiperazine-N'-2-ethanesulfonic acid (HEPES), and 0.5 mM disodium salt of ethylenediamine tetraacetic acid ( $\text{Na}_2\text{-EDTA}$ ). The washed ventricular segments were placed in  $\text{Ca}^{2+}$ -free Tyrode's solution composed of 140 mM NaCl, 5.4 mM KCl, 5 mM  $\text{MgCl}_2$ , 5.5 mM glucose, 5 mM HEPES, 4 mg/ml collagenase (Type I, 161 units/mg; Worthington, Freehold, NJ), 2 mg/ml bovine albumin (Sigma Chemical Co., St. Louis, MO), 40  $\mu\text{M}$   $\text{CaCl}_2$ , 5 mM pyruvic acid, and 5.5 mM disodium salt of adenosine

triphosphate ( $\text{Na}_2\text{-ATP}$ ); the pH was adjusted to 6.2 with NaOH. The solution containing ventricular tissue was incubated at 37°C for 1 to 2 h in a slow shaker. After this incubation, single ventricular cells were washed three times in cold potassium glutamate (K-glutamate) solution composed of 130 mM K-glutamate, 5.7 mM  $\text{MgCl}_2$ , 5 mM HEPES, 5.5 mM glucose, 5 mM  $\text{Na}_2\text{-ATP}$ , and 0.12 mM  $\text{Na}_2\text{-EDTA}$ ; the pH was adjusted to 7.4 with KOH. Dispersed cells were stored in K-glutamate solution at 4°C before use.

### Voltage-clamp Recording

A drop of dispersed single canine ventricular cells was placed in a perfusion chamber (22°C) on the stage of an inverted microscope (Olympus IMT-2; Leeds Instruments, Minneapolis, MN) equipped with modulation contrast. At 500 $\times$  magnification, a hydraulic micromanipulator (Narishige, Tokyo, Japan) was used to position heat-polished borosilicate patch pipettes with tip resistance of 4 to 6  $\text{M}\Omega$  on the membrane of ventricular cells. High-resistance seals (3 to 30  $\text{G}\Omega$ ) were formed, after which the pipette patch was removed by negative pressure to obtain the electrical access to the whole cell as previously described.<sup>17</sup> Whole-cell currents were elicited by 200-ms depolarizing pulses generated by a computerized system (pClamp software; Axon Instruments, Burlingame, CA) every 5 to 10 s. The currents were amplified by a List EPC-7 patch-clamp amplifier (Adams & List Associates, Great Neck, NY), and the amplifier output was low-pass filtered at 500 Hz. All data were digitized (sampling rate = 10,000/s) and stored on a hard disk to permit analysis at a later time. For the  $I_{\text{Ca}}$ , the leak and capacitative currents were subtracted from each record by linearly summing scaled currents obtained during 10-mV hyperpolarizing pulses.

### Recording Solutions

The external solution used to measure  $I_{\text{Ca}}$  contained: 10 mM  $\text{BaCl}_2$ , 135 mM tetraethylammonium chloride, 1 mM  $\text{MgCl}_2$ , 10 mM glucose, and 10 mM HEPES (pH = 7.4). The pipette solution used to measure  $I_{\text{Ca}}$  contained: 130 mM CsCl, 5 mM adenosine triphosphate (magnesium salt), 5 mM ethyleneglycol-bis-( $\beta$ -aminoethyl ether) N,N,N',N'-tetraacetic acid (EGTA), 10 mM HEPES, 1 mM  $\text{MgCl}_2$ , and 10 mM glucose (pH = 7.2).

The external solution used to measure  $I_{\text{K}}$  contained: 135 mM NaCl, 5.5 mM dextrose, 0.5 mM  $\text{MgCl}_2$ , 4 mM KCl, and 2 mM  $\text{CaCl}_2$  (pH = 7.4). The pipette solution used to measure  $I_{\text{K}}$  contained: 125 mM potassium aspar-

††Williams JP, McArthur DJ, Walker EW, Rietsema K, Teunissen E, Bonnenkamp H, Goderie P, Stanley HT: A comparison of the hemodynamics of Diprivan (propofol), thiopental, and etomidate for induction of anesthesia in patients with coronary artery disease. *Semin Anesth* 1988; 7:112-5.

‡‡Wegrzynowicz ES, Matsuda J, Volk K, Shibata E, Wachtel R: Propofol decreases voltage activated calcium currents in rabbit heart myocytes (Abstract). *ANESTHESIOLOGY* 1990; 73:A592.

tate, 20 mM KCl, 10 mM EGTA, 5 mM adenosine triphosphate (magnesium salt), 1 mM MgCl<sub>2</sub>, and 5 mM HEPES (pH = 7.2).

#### Drug Effects

Repetitive current-voltage curves were obtained in the control solution to monitor time-dependent changes in I<sub>Ca</sub> and I<sub>K</sub>, followed by exposure to 5, 30, or 60 μM etomidate, midazolam, or propofol. Effects of anesthetics on I<sub>Ca</sub> and I<sub>K</sub> were complete within 6 min and were reversible with washout.

The recommended intravenous doses to induce anesthesia are approximately 0.2 to 0.4 mg/kg for midazolam, 0.3 mg/kg for etomidate, and 2.5 mg/kg for propofol. It was reported that plasma protein-bound fraction of midazolam and propofol is 97%, whereas for etomidate it is 76%. Peak plasma concentrations during induction with these doses vary widely but are reported to be approximately 0.5 to 3 μM for midazolam,<sup>1,18-20</sup> 3 μM for etomidate,<sup>21</sup> and 50 μM for propofol.<sup>22,23</sup> For our study, intravenous anesthetics were obtained commercially in their vehicles (2 mg/ml etomidate, 5 mg/ml midazolam, and 10 mg/ml propofol). Each anesthetic was diluted in a given extracellular solution to make 1 mM stock solution that was divided into aliquots, frozen at -15°C, and thawed for daily use. Measured volumes of the 1-mM concentration of each drug were diluted into a known volume of perfusate to obtain perfusate drug concentrations of 5, 30, and 60 μM. Cells were randomly exposed to one of the anesthetic agents, at one of three concentrations. 4-aminopyridine (4-AP; Sigma Chemical Co.) and barium chloride (Ba<sup>2+</sup>; Fisher Scientific, Itasca, IL) were dissolved directly in the recording solution. Nifedipine (Sigma Chemical Co.) was dissolved in 70% ethanol to make 1 mM stock solution, yielding a final solvent concentration in the recording solution of 0.07%, which by itself did not affect the current. Cobalt chloride (Co<sup>2+</sup>; Sigma Chemical Co.) was dissolved directly in the recording solution. Tetrodotoxin (TTX; Sigma Chemical Co.) was dissolved in the recording solution to make 1 mM stock solution.

Vehicle preparations of etomidate (350 mg/mL propylene glycol in H<sub>2</sub>O), propofol (Intralipid; 100 mg/ml soybean oil, 22.5 mg/ml glycerol, and 12 mg/ml egg lecithin in water), and midazolam (0.01% disodium ede-

tate and 1% benzyl alcohol in water, adjusted to pH of 3 with 0.1 NHCl<sub>3</sub>) were also prepared and administered in separate groups of cells (n = 2 to 4) at the concentrations that would correspond to the highest drug concentration given in this study (60 μM) over the same time period (6 to 10 min). None of the drug vehicles had any effect (change <5%) on either I<sub>Ca</sub>, I<sub>Kto</sub>, or I<sub>K1</sub>.

#### Statistical Analysis

All currents are expressed as means ± SEM and were analyzed by two-way analysis of variance. If the F-test showed significance, Fisher's test for least significant differences was performed, with the level of significance designated at *P* ≤ 0.05.

## Results

#### Calcium Current

Calcium current (I<sub>Ca</sub>) was generated by depolarizing pulses (10 mV; 200 ms) from a holding potential of -40 mV to a command potential as high as +40 mV. All experiments were performed with Ba<sup>2+</sup> (10 mM) as the charge carrier in place of external Ca<sup>2+</sup> (2 mM); this substitution increased the peak of I<sub>Ca</sub> and decreased the rate of inactivation. In 64 cells (each group containing 5 to 9 cells), the threshold activation occurred at approximately -30 mV and the maximal activation was reached between -10 and 0 mV. This I<sub>Ca</sub> resembled high-threshold, long-lasting (L-type) Ca<sup>2+</sup> channel current previously described by researchers in our laboratory<sup>24</sup> and by others.<sup>25-27</sup> Figure 1 (upper panel) illustrates the effects of 60 μM etomidate (A), propofol (B), and midazolam (C) on the peak I<sub>Ca</sub> elicited by the test pulse from a holding potential of -40 mV to 0 mV in three canine ventricular cells. Peak I<sub>Ca</sub> (fig. 1A-C, lower panel) was plotted as a function of membrane potential to analyze the effects of etomidate (A), propofol (B), and midazolam (C) on the current-voltage relations for I<sub>Ca</sub> activation. Figure 1D summarizes decreases of the peak I<sub>Ca</sub> amplitude by all three anesthetics. Etomidate at concentrations of 5 μM, 30 μM, and 60 μM decreased the peak I<sub>Ca</sub> amplitude by 3 ± 3% (n = 7, NS), 10 ± 6% (n = 7, NS) and 16 ± 4% (n = 6; *P* ≤ 0.05), respectively. Propofol at concentrations of 5 μM, 30 μM, and 60 μM also decreased the peak I<sub>Ca</sub> amplitude by 10 ± 3% (n = 6, NS), 21 ± 4% (n = 9; *P* ≤ 0.05), and 33 ± 6% (n = 9; *P* ≤ 0.05), respectively. In a dose-dependent manner, 5 μM, 30 μM, and 60 μM midazolam decreased the

§§White PF: Propofol: Pharmacokinetics and pharmacodynamics. *Semin Anesth* 1988; 7:4-20.

IV AN  
A  
Downloaded from www.anesthesiology.com at National Institute of Health on April 7, 2014  
Fig. 1. Midazolam, propofol, and etomidate decrease peak I<sub>Ca</sub> amplitude in canine ventricular cells. (A) Control, (B) 60 μM propofol, (C) 60 μM etomidate, (D) 60 μM midazolam. \**P* ≤ 0.05, NS = not significant. n = 5-9. At eq... tent an... The eff... dent (A... crease... Furth... depolar... to 0 m... decreas... Anesthesi...

## IV ANESTHETICS ON MEMBRANE CURRENTS

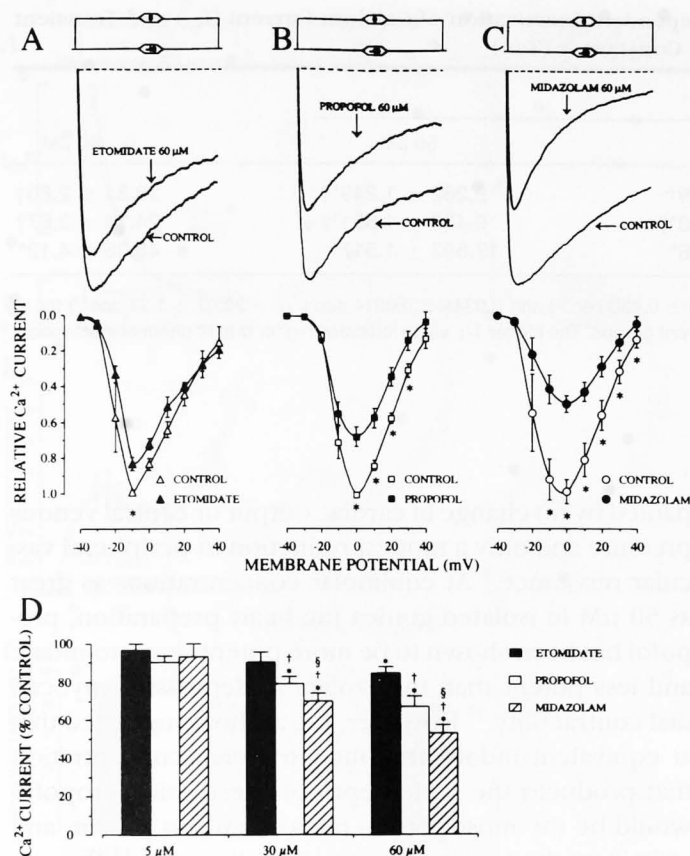

Fig. 1. Effects of 60  $\mu\text{M}$  etomidate (A), propofol (B), and midazolam (C) on inward  $\text{Ca}^{2+}$  channel current ( $I_{\text{Ca}}$ ) elicited by depolarizing pulse from a holding potential (HP) of  $-40$  to  $0$  mV in three ventricular cells (upper), and corresponding current-voltage relationships (lower). The control current-voltage relationship for activation of  $I_{\text{Ca}}$  (expressed as a fraction of control maximal  $I_{\text{Ca}}$ ) was reduced by all three anesthetics. \* $P \leq 0.05$  versus anesthetic. Concentration-dependent decrease of the peak  $I_{\text{Ca}}$  amplitude (expressed as a percentage of control) by 5, 30, and 60  $\mu\text{M}$  etomidate, propofol, and midazolam in a total of 64 canine ventricular cells is shown in panel D. \* $P \leq 0.05$  versus control; † $P \leq 0.05$  versus etomidate; § $P \leq 0.05$  midazolam versus propofol.

peak  $I_{\text{Ca}}$  amplitude by  $7 \pm 7\%$  ( $n = 7$ , NS),  $30 \pm 4\%$  ( $n = 5$ ;  $P \leq 0.05$ ), and  $47 \pm 5\%$  ( $n = 8$ ;  $P \leq 0.05$ ), respectively.

At equimolar concentrations, midazolam was most potent among the intravenous anesthetics in inhibiting  $I_{\text{Ca}}$ . The effects of these agents on  $I_{\text{Ca}}$  were voltage independent (*i.e.*, there was no difference in percentage decrease among different voltages).

Further analysis of the current traces produced by the depolarization step from a holding potential of  $-40$  mV to  $0$  mV revealed that all three anesthetics not only decreased the peak  $I_{\text{Ca}}$  but also hastened the inactivation

of  $I_{\text{Ca}}$  and thus further contributed to a decrease of total  $\text{Ca}^{2+}$  influx. The inactivation phase of  $I_{\text{Ca}}$  trace was best fitted with a single exponential curve with an average control inactivation constant ( $\tau$ ) of  $0.185 \pm 0.013$  s. Although all three anesthetics decreased the inactivation constant at 60  $\mu\text{M}$ , etomidate given at 5 and 30  $\mu\text{M}$  did not significantly alter the inactivation constant (table 1). Although propofol significantly decreased  $\tau$  at two higher concentrations, it produced a significantly smaller ( $P \leq 0.05$ ) decrease compared with the same concentration of midazolam. The effects of intravenous anesthetics on  $I_{\text{Ca}}$  were readily reversible with washout.

## Potassium Current

During the 200-ms depolarizing pulses from  $-90$  mV to consecutively more positive voltages as high as  $+60$  mV, cells showed transient outward  $\text{K}^+$  current ( $\text{IK}_{\text{to}}$ ) and an inward-rectifier  $\text{K}^+$  current ( $\text{IK}_{\text{I}}$ ). To measure  $\text{IK}_{\text{to}}$  and  $\text{IK}_{\text{I}}$ , all experiments were done in the presence of 20  $\mu\text{M}$  tetrodotoxin (TTX) and 2 mM cobalt chloride ( $\text{Co}^{2+}$ ) in the external solution to block  $\text{Na}^+$  and  $\text{Ca}^{2+}$  currents, respectively. Addition of nifedipine (1  $\mu\text{M}$ ) in the external solution produced no significant changes in  $\text{IK}$  amplitude, indicating that this current is not influenced by the  $\text{Ca}^{2+}$  influx *via* the L-type  $\text{Ca}^{2+}$  channel. Voltage-dependent  $\text{IK}_{\text{I}}$  was activated approximately at voltages negative to  $-20$  mV and was completely abolished by 1 mM  $\text{Ba}^{2+}$  in the external solution, as described previously.<sup>28-30</sup> Voltage-dependent  $\text{IK}_{\text{to}}$  was identified as  $\text{IK}_{\text{to1}}$  subtype because it was blocked by 2 mM 4-aminopyridine (4-AP) in the external solution.<sup>31-35</sup>

Figure 2A shows actual recordings of the peak  $\text{IK}_{\text{I}}$  and  $\text{IK}_{\text{to}}$  elicited by depolarizing pulses from a holding potential of  $-90$  to  $-50$  mV, and from  $-90$  to  $+60$  mV, respectively, in control solution and during exposure to 60  $\mu\text{M}$  etomidate, propofol, and midazolam in three ventricular cells. Peak  $\text{IK}_{\text{to}}$  and  $\text{IK}_{\text{I}}$  were plotted as a function of membrane potential to analyze the mean anesthetic effect on the current amplitude (fig. 2B). At equimolar concentrations, etomidate, propofol, and midazolam caused reversible decreases in the peak  $\text{IK}_{\text{to}}$  amplitude (at  $+60$  mV) by  $8 \pm 3\%$  ( $n = 8$ ;  $P \leq 0.05$ ),  $9 \pm 2\%$  ( $n = 6$ ;  $P \leq 0.05$ ), and  $23 \pm 3\%$  ( $n = 15$ ;  $P \leq 0.05$ ), respectively. At the same concentration, etomidate and midazolam produced reversible decreases in the peak  $\text{IK}_{\text{I}}$  amplitude (at  $-50$  mV) by  $20 \pm 6\%$  ( $n = 8$ ;  $P \leq 0.05$ ), and  $14 \pm 5\%$  ( $n = 15$ ;  $P \leq 0.05$ ). Propofol had no effect on  $\text{IK}_{\text{I}}$  ( $n = 6$ ). The effects of intravenous anesthetics on  $\text{IK}_{\text{to}}$  and  $\text{IK}_{\text{I}}$  were not voltage dependent.

**Table 1. Effects of Midazolam, Etomidate, and Propofol on Time-dependent Inactivation of Calcium Current ( $I_{Ca}$ ) and Transient Outward Potassium Current ( $I_{Kto}$ ) as Characterized by Inactivation Constant,  $\tau$  (Tau)**

| Drug      | $I_{Ca}$           |                     |                     | $I_{Kto}$ (60 $\mu$ M) |
|-----------|--------------------|---------------------|---------------------|------------------------|
|           | 5 $\mu$ M          | 30 $\mu$ M          | 60 $\mu$ M          |                        |
| Etomidate | 5.341 $\pm$ 0.885† | 6.421 $\pm$ 0.449†  | 9.262 $\pm$ 1.249*† | 30.34 $\pm$ 2.60†      |
| Propofol  | 6.51 $\pm$ 0.820   | 8.338 $\pm$ 1.260*† | 9.432 $\pm$ 1.591*† | 24.14 $\pm$ 3.67†      |
| Midazolam | 7.244 $\pm$ 1.345* | 10.638 $\pm$ 1.828* | 17.593 $\pm$ 1.517* | 45.35 $\pm$ 4.12*      |

Data are shown as  $1/\tau$ . The control  $\tau$  values were 0.185  $\pm$  0.013 sec ( $1/\tau = 5.405 \pm 0.430 \text{ sec}^{-1}$ ) and 0.0344  $\pm$  0.0014 sec ( $1/\tau = 29.07 \pm 1.37 \text{ sec}^{-1}$ ) for  $I_{Ca}$  and  $I_{Kto}$ , respectively. The control values were not significantly different among different groups. The higher  $1/\tau$  value indicates higher rate of channel inactivation.

\*  $P \leq 0.05$  versus initial control.

†  $P \leq 0.05$  versus midazolam.

The decrease of  $I_{Kto}$  and  $I_{K1}$  amplitude by intravenous anesthetics was completely reversed with washout.

At equimolar concentrations, all three anesthetics significantly decreased  $I_{Kto}$ ; however, midazolam was more potent than etomidate and propofol (fig. 2C). At the same concentration, etomidate and midazolam produced similar and statistically significant decreases in  $I_{K1}$ , whereas propofol had no effect (fig. 2D).

Similar to  $I_{Ca}$ ,  $I_{Kto}$  current that was obtained by a depolarization step from a holding potential of  $-90$  mV to  $+60$  mV was also fitted with a single exponential curve to study its inactivation kinetics. The control inactivation constant ( $\tau$ ) was 0.034  $\pm$  0.0014 s. Neither etomidate nor propofol changed the inactivation constant but midazolam decreased the inactivation constant by nearly 40% (table 1).

## Discussion

Intravenous anesthetics cause various degrees of cardiovascular depression *in vivo*<sup>1-5</sup> and *in vitro*.<sup>13,15,16\*\*</sup> The differences in cardiovascular depression could result from their differential effects on systemic vascular resistance,<sup>6,7</sup> venous capacitance,<sup>8,9</sup> the autonomic nervous system, and the heart.<sup>10,11</sup>

Etomidate produces only minimal effects on cardiovascular dynamics<sup>2,11</sup> and therefore is widely recommended for patients with compromised cardiac function and hypotension. On the other hand, propofol produces cardiovascular depression to a larger extent than does etomidate,<sup>4,11\*\*</sup> and thus propofol should be used cautiously in patients with hypovolemia. It was reported that induction of anesthesia with midazolam, even in patients with limited coronary flow, was accom-

panied by no change in cardiac output or central venous pressure and only a modest reduction in peripheral vascular resistance.<sup>7</sup> At equimolar concentrations as great as 50  $\mu$ M in isolated guinea pig heart preparation, propofol has been shown to be more potent than etomidate and less potent than midazolam in depressing myocardial contractility.<sup>15</sup> However, the authors suggested that at equivalent induction concentrations (concentration that produces the same depth of anesthesia), propofol would be the most potent, midazolam less potent, and etomidate the least potent negative inotrope.<sup>15</sup> Despite the extensive literature documenting differences in negative inotropic effects among intravenous anesthetics, very little is known about the mechanisms underlying these differences.

Our purpose in this study was to identify and compare the actions of etomidate, propofol, and midazolam on macroscopic  $Ca^{2+}$  and  $K^+$  currents in isolated canine ventricular myocytes to identify possible mechanisms for the observed differences in negative inotropic effects of these anesthetics.

Inward  $Ca^{2+}$  current ( $I_{Ca}$ ), transient outward  $K^+$  current ( $I_{Kto}$ ), and inward-rectifier  $K^+$  current ( $I_{K1}$ ) contribute to the electrical activity in human,<sup>36</sup> rabbit<sup>37</sup> and canine ventricular myocytes<sup>38</sup> and are the major determinants of the action potential duration in these cells.<sup>34,39</sup> The efflux of  $K^+$  through  $K^+$  channels is functioning as an important modulator of the action potential in canine ventricular myocytes,<sup>35,40,41</sup> offsetting  $Ca^{2+}$  current and thus preventing early slow-response action potentials<sup>42</sup> while maintaining a high resting membrane potential in latent pacemaker cells.<sup>43</sup>

Our results show that etomidate, propofol, and midazolam reduce the amplitude of  $I_{Ca}$ ,  $I_{Kto}$ , and  $I_{K1}$  in these

## IV ANESTHETICS ON MEMBRANE CURRENTS

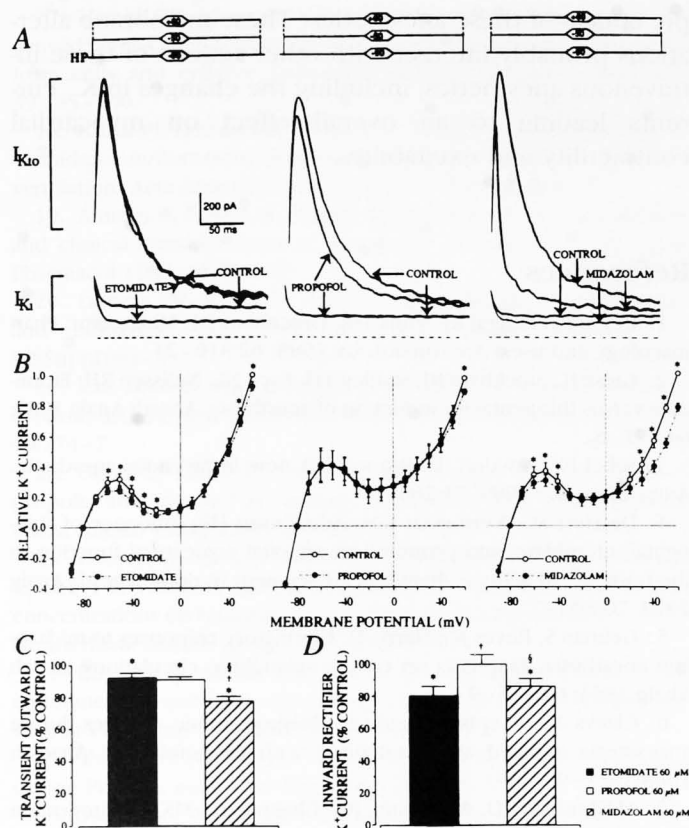

Fig. 2. Effects of 60  $\mu\text{M}$  etomidate, propofol, and midazolam on the peak transient K<sup>+</sup> channel current amplitude (I<sub>Kto</sub>) elicited by depolarizing pulse from a holding potential (HP) of -90 to +60 mV, and the peak inward-rectifier K<sup>+</sup> channel current amplitude (I<sub>Ki</sub>) elicited by a depolarizing pulse from a holding potential (HP) of -90 to -50 mV in three ventricular cells (A). The control current-voltage relation for the activation of I<sub>Kto</sub> (expressed as a fraction of control maximal K<sup>+</sup> current) at voltages positive to -20 mV, and I<sub>Ki</sub> at voltages negative to -20 mV, under control conditions and in the presence of 60  $\mu\text{M}$  etomidate (B, left), propofol (B, center), and midazolam (B, right). \* $P \leq 0.05$  versus anesthetic. The decrease (expressed as a percentage of control) of the peak I<sub>Kto</sub> amplitude (C), and maximum I<sub>Ki</sub> amplitude (D) by 60  $\mu\text{M}$  etomidate, propofol, and midazolam in a total of 29 canine ventricular cells. \* $P \leq 0.05$  versus control; † $P \leq 0.05$  versus etomidate; § $P \leq 0.05$  midazolam versus propofol.

cells. Furthermore, these three channel types were not equally sensitive to block by these anesthetics, and I<sub>Ca</sub> was blocked more effectively than I<sub>Kto</sub> or I<sub>Ki</sub>. Midazolam was the most potent in decreasing peak I<sub>Ca</sub>, whereas etomidate was the least potent. A recent study using the whole-cell and single-channel recordings in guinea pig ventricular myocytes found that 4.4 and 27.4  $\mu\text{M}$  etomidate decreased the whole-cell L-type I<sub>Ca</sub>.<sup>27</sup> Similar concentrations of etomidate did not produce attenua-

tion of I<sub>Ca</sub> in this study, suggesting the possibility of differences between species (guinea pig *vs.* dog). Another possibility is that the large decrease in I<sub>Ca</sub> observed by Takahashi and Terrar<sup>44</sup> is partially due to a significant I<sub>Ca</sub> rundown in guinea pig myocytes as reported by the same authors. The relative potency of intravenous anesthetics in depressing I<sub>Ca</sub> correlates well with *in vitro* and *in vivo* depression of contractility, supporting the hypothesis that the block of I<sub>Ca</sub> is one of the most important factors in determining the negative inotropic effect of intravenous anesthetics. Effects of all three anesthetics on I<sub>Ca</sub> were dose dependent and readily reversible.

In addition to decreasing the peak current, intravenous anesthetics could decrease a total I<sub>Ca</sub> by increasing the rate of inactivation of open Ca<sup>2+</sup> channels. Indeed, analysis (single exponential fit) of the inactivation portion of the I<sub>Ca</sub> revealed that midazolam dramatically increased the rate of I<sub>Ca</sub> inactivation. Propofol was less potent, whereas only 60  $\mu\text{M}$  etomidate significantly increased the rate of I<sub>Ca</sub> inactivation. Absence of the effect of 5  $\mu\text{M}$  etomidate on I<sub>Ca</sub> inactivation rate that we found correlates with the findings of Takahashi and Terrar,<sup>27</sup> who reported no effect of a similar dose of etomidate on the single Ca<sup>2+</sup> channel kinetics. At 27.4  $\mu\text{M}$ , etomidate reduced the mean open time and increased the mean closed time, favoring the closed state without any effect on conductance.<sup>27</sup> In our study, 30  $\mu\text{M}$  etomidate did not alter the I<sub>Ca</sub> inactivation rate, which could be consistent with the relatively greater effect seen in their study. The same group reported that a high concentration of propofol (100  $\mu\text{M}$ ) also decreased the mean open time and increased the mean closed time without changing I<sub>Ca</sub> channel conductance.<sup>44</sup> Decreased peak current and increased rate of inactivation by propofol seen in this study are consistent with their observations at the single-channel level. The increased rate of I<sub>Ca</sub> inactivation suggests that midazolam, and to a lesser degree propofol and etomidate, bind to the open Ca<sup>2+</sup> channel and through an interaction with the gating mechanism increase the rate of transition of the channel from an open to inactivated state. Further studies investigating frequency and voltage dependence, rate of recovery from inactivation, and the single-channel recordings are needed to determine the exact nature of this interaction.

Midazolam was the most potent and propofol the least potent in depressing I<sub>Kto</sub> in ventricular cells. The decrease in amplitude of I<sub>Kto</sub> by these anesthetics suggests

that these agents may influence the phase 1 repolarization and early plateau phase of the action potential.<sup>31</sup> These alterations of plateau voltage may result in changes in other voltage-dependent currents during the plateau phase, including augmented  $I_{Ca}$ , and therefore cytosolic  $Ca^{2+}$  concentration, contractility, and duration of the action potential in the ventricular myocytes.<sup>31,38</sup> However, the magnitude of  $I_K$  decrease may not be able to overcome a large decrease in  $I_{Ca}$ , as suggested by shortened action potential duration in the presence of propofol.<sup>45</sup> It is of great interest that midazolam increased the rate of  $IK_{to}$  inactivation, whereas propofol and etomidate did not change channel inactivation. The mechanism(s) underlying similar effects of midazolam on  $I_{Ca}$  and  $IK_{to}$  inactivation are not clear.

Etomidate exerted the greatest depressant effect on  $IK_1$ , whereas propofol had no effect. Baum<sup>46</sup> has reported the lack of propofol's effect on  $IK_1$  in guinea pig ventricular myocytes. Blockade of  $IK_1$  can affect the duration of the action potential and the rate of repolarization because this current is activated during the repolarization of the cardiac action potential.<sup>47</sup> This current plays a critical role in determining the amplitude and shape of the subthreshold response,<sup>29,48</sup> thus influencing the excitability of ventricular myocytes. Therefore, a depressant effect of intravenous anesthetics on the outward  $I_K$  would alter resting membrane potential and affect action potential duration and cellular excitability.

Despite the inhibition of both  $I_{Ca}$  and  $I_K$ , the greater decrease of  $I_{Ca}$  may be responsible for the negative inotropic effect observed with these agents. Although midazolam produced the largest decrease of  $I_{Ca}$ , the final effect on myocardial contractility would be dramatically attenuated due to a decrease of  $I_K$  and its significantly smaller induction dose. Because the induction concentration of midazolam is less than 5  $\mu M$ , midazolam would probably be free of effects on  $I_{Ca}$  when anesthesia is induced.

Etomidate, propofol, and midazolam produced a dose-dependent decrease of  $Ca^{2+}$  influx and a type-dependent decrease of  $K^+$  efflux. These anesthetics, particularly midazolam, also increased the rate of  $I_{Ca}$  and  $I_K$  (only midazolam) inactivation, thus further decreasing the total current. Our data suggest that cardiac depression caused by intravenous anesthetics is due, at least in part, to a decreased amplitude of  $I_{Ca}$ , as directly measured by the whole-cell voltage-clamp method. The relative magnitude of a decrease in  $I_{Ca}$  correlates well with clinically and experimentally observed negative inotropic

effects of these anesthetics. These membrane alterations probably interact with other actions of these intravenous anesthetics, including the changes in  $K^+$  currents leading to an overall effect on myocardial contractility and excitability.

## References

1. Reves JG, Fragen RJ, Vinik HR, Greenblatt DJ: Midazolam: Pharmacology and uses. *ANESTHESIOLOGY* 1985; 62:310-24
2. Giese JL, Stockham RJ, Stanley TH, Pace NL, Nelissen RH: Etomidate versus thiopental for induction of anesthesia. *Anesth Analg* 1985; 64:871-6
3. Sebel PS, Lowdon JD: Propofol: A new intravenous anesthetic. *ANESTHESIOLOGY* 1989; 71:260-77
4. De Hert SG, Vermeyen KM, Adriaensen HF: Influence of thiopental, etomidate, and propofol on regional myocardial function in the normal and acute ischemic heart segment in dogs. *Anesth Analg* 1990; 70:600-7
5. Gelman S, Reves JG, Harris D: Circulatory responses to midazolam anesthesia: Emphasis on canine splanchnic circulation. *Anesth Analg* 1983; 62:135-9
6. Claeys MA, Gepts E, Camu F: Haemodynamic changes during anaesthesia induced and maintained with propofol. *Br J Anaesth* 1988; 60:3-9
7. Al-Khudhairi D, Whitwam JG, Chakrabarti MK, Askitopoulou H, Grundy EM, Powrie S: Haemodynamic effects of midazolam and thiopentone during induction of anaesthesia for coronary artery surgery. *Br J Anaesth* 1982; 54:831-5
8. Goodchild CS, Serrao JM: Cardiovascular effects of propofol in the anaesthetized dog. *Br J Anaesth* 1989; 63:87-92
9. Marty J, Nitenberg A, Blanchet F, Zouieueche S, Desmots JM: Effects of midazolam on the coronary circulation in patients with coronary artery disease. *ANESTHESIOLOGY* 1986; 64:206-10
10. Mulier JP, Wouters PF, Van Aken H, Vermaut G, Vandermeersch E: Cardiodynamic effects of propofol in comparison with thiopental: Assessment with a transesophageal echocardiographic approach. *Anesth Analg* 1991; 72:28-35
11. Brussel T, Theissen JL, Vigfusson G, Lunkenheimer PP, Van Aken H, Lawin P: Hemodynamic and cardiodynamic effects of propofol and etomidate: Negative inotropic properties of propofol. *Anesth Analg* 1989; 69:35-40
12. Riou B, Lecarpentier Y, Chemala D, Viars P: *In vitro* effects of etomidate on intrinsic myocardial contractility in the rat. *ANESTHESIOLOGY* 1990; 72:330-40
13. Komai H, DeWitt DE, Rusy BF: Negative inotropic effect of etomidate in rabbit papillary muscle. *Anesth Analg* 1985; 64:400-4
14. Lepage JY, Pinaud ML, Helias JH, Juge CM, Cozian AY, Farinotti R, Souron RJ: Left ventricular function during propofol and fentanyl anesthesia in patients with coronary artery disease: Assessment with a radionuclide approach. *Anesth Analg* 1988; 67:949-55
15. Stowe DF, Bosnjak ZJ, Kampine JP: Comparison of etomidate, ketamine, midazolam, propofol, and thiopental on function and metabolism of isolated hearts. *Anesth Analg* 1992; 74:547-58
16. Reves JG, Kissin I, Fournier S: Negative inotropic effects of midazolam. *Anesthesiology* 1984; 60:517-8

## IV ANESTHETICS ON MEMBRANE CURRENTS

17. Hamill OP, Marty A, Neher E, Sakmann B, Sigworth FJ: Improved patch-clamp techniques for high-resolution current recording from cells and cell-free membrane patches. *Pflugers Arch* 1981; 391:85-100
18. Kulka PJ, Lauven PM, Schuttler J, Apffelstaedt C: Methohexital vs midazolam/flumazenil anaesthesia during laryngoscopy under jet ventilation. *Acta Anaesthesiol Scand* 1990; 92(Suppl):90-5
19. Amrein R, Eckert M, Haefeli H, Leishman B: Pharmacokinetic and clinical considerations in the choice of a hypnotic. *Br J Clin Pharmacol* 1983; 16:5S-10S
20. Lauven PM, Kulka PJ: Anaesthesia techniques for midazolam and flumazenil—An overview. *Acta Anaesth Scand* 1990; 92(Suppl):84-9
21. Van Hamme MJ, Ghoneim MM, Ambre JJ: Pharmacokinetics of etomidate, a new intravenous anesthetic. *ANESTHESIOLOGY* 1978; 49:274-7
22. Gepts E, Camu F, Cockshott ID, Douglas EJ: Disposition of propofol administered as constant rate intravenous infusions in humans. *Anesth Analg* 1987; 66:1256-63
23. Coetzee A, Fourie P, Coetzee J, Badenhorst E, Rebel A, Bolliger C, Uebel R, Wium C, Lombard C: Effect of various propofol plasma concentrations on regional myocardial contractility and left ventricular afterload. *Anesth Analg* 1989; 69:473-83
24. Bosnjak ZJ, Supan FD, Rusch NJ: The effects of halothane, enflurane, and isoflurane on calcium current in isolated canine ventricular cells. *ANESTHESIOLOGY* 1991; 74:340-5
25. Tseng GN, Boyden PA: Multiple types of  $Ca^{2+}$  currents in single canine Purkinje cells. *Circ Res* 1989; 65:1735-50
26. Tseng GN, Boyden PA: Different effects of intracellular  $Ca^{2+}$  and protein kinase C on cardiac T and L  $Ca^{2+}$  currents. *Am J Physiol* 1991; 261:H364-H79
27. Takahashi H, Terrar DA: Effects of etomidate on whole-cell and single L-type calcium channel currents in guinea pig isolated ventricular myocytes. *Br J Anaesth* 1994; 73:812-9
28. Tourneur Y, Mitra R, Morad M, Rougier O: Activation properties of the inward-rectifying potassium channel on mammalian heart cells. *J Membr Biol* 1987; 97:127-35
29. Tourneur Y: Action potential-like responses due to the inward rectifying potassium channel. *J Membr Biol* 1986; 90:115-22
30. Harvey R, Ten Eick R: Characterization of the inward-rectifying potassium current in cat ventricular myocytes. *J Gen Physiol* 1988; 91:593-615
31. Tseng GN, Hoffman BF: Two components of transient outward current in canine ventricular myocytes. *Circ Res* 1989; 64:633-47
32. Kenyon JL, Sutko JL: Calcium- and voltage-activated plateau currents of cardiac Purkinje fibers. *J Gen Physiol* 1987; 89:921-58
33. Escande D, Coulombe A, Faivre JF, Deroubaix E, Coraboeuf E: Two types of transient outward currents in adult human atrial cells. *Am J Physiol* 1987; 252:H142-8
34. Varro A, Nanasi PP, Lathrop DA: Voltage-clamp characteristics of ventricular myocytes in rabbit. *Cardioscience* 1991; 2:233-43
35. Kukushkin NI, Gainullin RZ, Sosunov EA: Transient outward current and rate dependence of action potential duration in rabbit ventricular muscle. *Pflugers Arch* 1983; 399:87-92
36. Nanasi PP, Varro A, Lathrop DA: Ionic currents in ventricular myocytes isolated from the heart of a patient with idiopathic cardiomyopathy. *Cardioscience* 1992; 3:85-9
37. Giles WR, Imaizumi Y: Comparison of potassium currents in rabbit atrial and ventricular cells. *J Physiol (London)* 1988; 405:123-45
38. Tseng GN, Robinson RB, Hoffman BF: Passive properties and membrane currents of canine ventricular myocytes. *J Gen Physiol* 1987; 90:671-701
39. Fermi B, Schanne OF: Determinants of action potential duration in neonatal rat ventricle cells. *Cardiovasc Res* 1991; 25:235-43
40. Josephon IR, Sanchez-Chapula J, Brown AM: Early outward current in rat single ventricular cells. *Circ Res* 1984; 54:157-62
41. Giles WR, van Ginneken AC: A transient outward current in isolated cells from the crista terminalis of rabbit heart. *J Physiol (London)* 1985; 368:243-64
42. Siegelbaum SA, Tsien RW: Calcium-activated transient outward current in calf cardiac Purkinje fibers. *J Physiol (London)* 1980; 299:485-506
43. Nakayama T, Irisawa H: Transient outward current carried by potassium and sodium in quiescent atrioventricular node cells of rabbits. *Circ Res* 1985; 57:65-73
44. Takahashi H, Puttick RM, Terrar DA: The effects of propofol and enflurane on single calcium channel currents of guinea-pig isolated ventricular myocytes. *Br J Pharmacol* 1994; 111:1147-53
45. Puttick RM, Terrar DA: Effects of propofol and enflurane on action potentials, membrane currents and contraction of guinea-pig isolated ventricular myocytes. *Br J Pharmacol* 1992; 107:559-65
46. Baum VC: Distinctive effects of three intravenous anesthetics on the inward rectifier ( $I_{K1}$ ) and the delayed rectifier ( $I_{Kr}$ ) potassium currents in myocardium: Implications for the mechanism of action. *Anesth Analg* 1993; 76:18-23
47. Ibarra J, Morley GE, Delmar M: Dynamics of the inward rectifier  $K^+$  current during the action potential of guinea pig ventricular myocytes. *Biophys J* 1991; 60:1534-9
48. Lorente P, Delgado C, Delmar M, Henzel D, Jalife J: Hysteresis in the excitability of isolated guinea pig ventricular myocytes. *Circ Res* 1991; 69:1301-15
